CORRECTION

## Correction: Prenatal exposure to extreme ambient heat may amplify the adverse impact of Superstorm Sandy on basal ganglia volume among school-aged children

Donato DeIngeniis, Melissa Blum, Rebecca M. Lee, Ahmed Duke Shereen, Yoko Nomura

In the Funding section, the grant number from the funder NIMH is listed incorrectly. The correct grant number is: R01MH131638.

### Reference

1. DeIngeniis D, Blum M, Lee RM, Shereen AD, Nomura Y. Prenatal exposure to extreme ambient heat may amplify the adverse impact of Superstorm Sandy on basal ganglia volume among school-aged children. PLoS One. 2025;20(6):e0324150. <https://doi.org/10.1371/journal.pone.0324150> PMID: [40498678](https://pubmed.ncbi.nlm.nih.gov/40498678/)

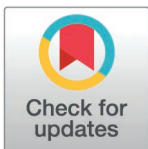

### OPEN ACCESS

**Citation:** DeIngeniis D, Blum M, Lee RM, Shereen AD, Nomura Y (2026) Correction: Prenatal exposure to extreme ambient heat may amplify the adverse impact of Superstorm Sandy on basal ganglia volume among school-aged children. PLoS One 21(1): e0341832. <https://doi.org/10.1371/journal.pone.0341832>

**Published:** January 27, 2026

**Copyright:** © 2026 DeIngeniis et al. This is an open access article distributed under the terms of the [Creative Commons Attribution License](https://creativecommons.org/licenses/by/4.0/), which permits unrestricted use, distribution, and reproduction in any medium, provided the original author and source are credited.
